# Supplementary material for: Least Squares Approximation to the Distribution of Project Completion Times with Gaussian Uncertainty
Source: Atypon-hosted journal article supplement (doi:10.1287/opre.2016.1528), 2016-09-30
Supplement: opre.2016.1528-sm.pdf [file opre.2016.1528-sm.pdf]

## Proof of Lemma 1

The proof is consolidated from Stein (1972), Stein (1981) and Liu (1994).

*The first result is the univariate version of Stein's Identity (cf. Stein (1972) and Stein (1981)).*

Let  $\tilde{c}$  follow a standard normal distribution,  $N(0,1)$ , and  $\phi(c)$  denote the standard normal density with the derivative satisfying  $\phi'(c) = -c\phi(c)$ . For any differentiable function  $h: \mathbb{R} \rightarrow \mathbb{R}$  such that  $\mathbf{E}[|h'(\tilde{c})|] < \infty$ ,

$$\begin{aligned}
 \mathbf{E}[h'(\tilde{c})] &= \int_{-\infty}^{\infty} h'(c)\phi(c) dc \\
 &= \int_0^{\infty} h'(c) \left[ \int_c^{\infty} z\phi(z) dz \right] dc + \int_{-\infty}^0 h'(c) \left[ \int_{-\infty}^c -z\phi(z) dz \right] dc \\
 &= \int_0^{\infty} z\phi(z) \left[ \int_0^z h'(c) dc \right] dz - \int_{-\infty}^0 z\phi(z) \left[ \int_z^0 h'(c) dc \right] dz \\
 &= \left( \int_0^{\infty} + \int_{-\infty}^0 \right) [z\phi(z) [h(z) - h(0)]] dz \\
 &= \int_{-\infty}^{\infty} z\phi(z) h(z) dz \\
 &= \mathbf{E}[\tilde{c}h(\tilde{c})],
 \end{aligned}$$

where the third equality is justified by Fubini's Theorem. Note that since  $\mathbf{E}[\tilde{c}] = 0$  and  $\text{Var}(\tilde{c}) = 1$ , the equality proved above is essentially

$$\text{Cov}(\tilde{c}, h(\tilde{c})) = \text{Var}(\tilde{c})\mathbf{E}[h'(\tilde{c})]. \quad (\text{EC.1})$$

*Next, we present the generalization of the result to the multivariate case (cf. Stein (1981) and Liu (1994)).*

Let  $\tilde{\mathbf{z}} = (\tilde{z}_1, \dots, \tilde{z}_n)^T$ , where  $\tilde{z}_j$ 's are independent and identically distributed standard normal random variables. From Equation (EC.1) it follows that for any function  $\hat{h}: \mathbb{R}^n \rightarrow \mathbb{R}$  satisfying the same conditions as  $h$  in the Theorem,

$$\mathbf{E} \left[ \tilde{z}_j \hat{h}(\tilde{\mathbf{z}}) \mid (\tilde{z}_1, \dots, \tilde{z}_{j-1}, \tilde{z}_{j+1}, \dots, \tilde{z}_n) \right] = \mathbf{E} \left[ \frac{\partial \hat{h}(\tilde{\mathbf{z}})}{\partial z_j} \mid (\tilde{z}_2, \dots, \tilde{z}_{j-1}, \tilde{z}_{j+1}, \dots, \tilde{z}_n) \right], \forall j = 1, \dots, n.$$

Taking the expectation of both sides, we get

$$\mathbf{E} \left[ \tilde{z}_1 \hat{h}(\tilde{\mathbf{z}}) \right] = \mathbf{E} \left[ \frac{\partial \hat{h}(\tilde{\mathbf{z}})}{\partial z_1} \right].$$

Using a similar argument for the remaining random variables, we can show that

$$\text{Cov}\left(\tilde{\mathbf{z}}, \hat{h}(\tilde{\mathbf{z}})\right) = \mathbf{E}\left[\nabla \hat{h}(\tilde{\mathbf{z}})\right].$$

Note that the random vector  $\tilde{\mathbf{c}}$  can be written as  $\tilde{\mathbf{c}} = \Sigma^{1/2}\tilde{\mathbf{z}} + \boldsymbol{\mu}$ . Consider  $\hat{h}(\tilde{\mathbf{z}}) = h(\Sigma^{1/2}\tilde{\mathbf{z}} + \boldsymbol{\mu})$ , then  $\nabla \hat{h}(\tilde{\mathbf{z}}) = \Sigma^{1/2}\nabla h(\tilde{\mathbf{c}})$ . Hence,

$$\text{Cov}(\tilde{\mathbf{c}}, h(\tilde{\mathbf{c}})) = \text{Cov}\left(\Sigma^{1/2}\tilde{\mathbf{z}}, \hat{h}(\tilde{\mathbf{z}})\right) = \Sigma^{1/2}\mathbf{E}\left[\nabla \hat{h}(\tilde{\mathbf{z}})\right] = \Sigma\mathbf{E}\left[\nabla h(\tilde{\mathbf{c}})\right].$$

## References

- Liu JS (1994) Siegel's formula via Stein's identities. *Statistics & Probability Letters*. 21: 247–251.
- Stein CM (1972) A bound for the error in the normal approximation to the distribution of a sum of dependent random variables. *Proceedings of the Berkeley Symposium on Mathematical Statistics and Probability*. 2: 583–602.
- Stein CM (1981) Estimation of the mean of a multivariate normal distribution. *The Annals of Statistics*. 9: 1135–1151.
